# Supplementary material for: Platelet activation in critically ill COVID-19 patients
Source: Springer Nature journal article supplement (doi:10.1186/s13613-021-00899-1), 2021-07-17

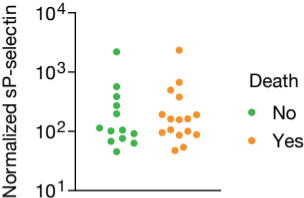

AUC = 0.54  
 $p = 0.71$

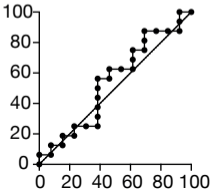

Supplement: MOESM2 [file 19369816]
